# Supplementary material for: Spatial patterns and frequency distributions of regional deformation in the healthy human lung
Source: Springer Nature journal article supplement (doi:10.1007/s10237-017-0895-5), 2017-03-18
Supplement: 10237_2017_895_MOESM2_ESM.pdf [file 10237_2017_895_MOESM2_ESM.pdf]

Supplementary Material 02: Statistical descriptors and log-normal fit for  $I_1$  and  $I_2$

| Subject | Mean  |       | St. Dev. |       | Kurt. |       | Skew.  |        |
|---------|-------|-------|----------|-------|-------|-------|--------|--------|
|         | LL    | RL    | LL       | RL    | LL    | RL    | LL     | RL     |
| S01     | 1.249 | 1.236 | 0.135    | 0.117 | 0.717 | 1.972 | 0.738  | 0.933  |
| S02     | 1.303 | 1.319 | 0.093    | 0.107 | 0.940 | 1.065 | 0.731  | 0.543  |
| S03     | 1.273 | 1.286 | 0.114    | 0.142 | 0.885 | 0.219 | 0.579  | 0.723  |
| S04     | 1.245 | 1.218 | 0.092    | 0.068 | 1.537 | 1.272 | 0.568  | 0.536  |
| S05     | 1.552 | 1.491 | 0.122    | 0.122 | 0.763 | 0.487 | 0.422  | 0.203  |
| S06     | 1.502 | 1.498 | 0.097    | 0.099 | 1.200 | 0.939 | -0.057 | 0.176  |
| S07     | 1.260 | 1.253 | 0.098    | 0.096 | 1.896 | 2.045 | 0.408  | 0.368  |
| S08     | 1.460 | 1.466 | 0.165    | 0.154 | 0.046 | 1.904 | -0.042 | 0.428  |
| S09     | 1.140 | 1.136 | 0.073    | 0.079 | 1.433 | 2.171 | 0.346  | 0.681  |
| S10     | 1.376 | 1.362 | 0.112    | 0.101 | 0.522 | 1.136 | 0.216  | -0.040 |
| S11     | 1.460 | 1.445 | 0.171    | 0.184 | 0.961 | 1.209 | 0.869  | 0.704  |

Table 1: Statistical measures for the left lung (LL) and right lung (RL) distributions of  $I_1$

| Subject | Mean  |       | St. Dev. |       | Kurt. |       | Skew.  |       |
|---------|-------|-------|----------|-------|-------|-------|--------|-------|
|         | LL    | RL    | LL       | RL    | LL    | RL    | LL     | RL    |
| S01     | 1.538 | 1.503 | 0.334    | 0.291 | 1.425 | 3.425 | 0.978  | 1.240 |
| S02     | 1.681 | 1.710 | 0.249    | 0.294 | 1.331 | 1.382 | 0.822  | 0.637 |
| S03     | 1.593 | 1.609 | 0.290    | 0.359 | 1.861 | 0.901 | 0.821  | 0.902 |
| S04     | 1.535 | 1.463 | 0.223    | 0.171 | 1.816 | 1.630 | 0.680  | 0.589 |
| S05     | 2.338 | 2.171 | 0.371    | 0.360 | 0.864 | 0.661 | 0.503  | 0.326 |
| S06     | 2.218 | 2.189 | 0.283    | 0.294 | 0.992 | 0.991 | -0.026 | 0.258 |
| S07     | 1.577 | 1.531 | 0.249    | 0.233 | 2.083 | 1.738 | 0.681  | 0.184 |
| S08     | 2.079 | 2.068 | 0.474    | 0.414 | 0.313 | 0.651 | 0.191  | 0.227 |
| S09     | 1.291 | 1.274 | 0.166    | 0.180 | 1.942 | 3.094 | 0.494  | 0.874 |
| S10     | 1.862 | 1.817 | 0.305    | 0.276 | 0.738 | 1.043 | 0.393  | 0.089 |
| S11     | 2.085 | 2.021 | 0.511    | 0.549 | 1.959 | 2.489 | 1.154  | 1.130 |

Table 2: Statistical measures for the left lung (LL) and right lung (RL) distributions of  $I_2$

| Subject         | $\hat{\mu}$ |       | $\hat{\sigma}$ |       | Error [%] |      |
|-----------------|-------------|-------|----------------|-------|-----------|------|
|                 | LL          | RL    | LL             | RL    | LL        | RL   |
| S01             | 0.217       | 0.208 | 0.106          | 0.092 | 10.1      | 14.7 |
| S02             | 0.262       | 0.273 | 0.070          | 0.080 | 10.2      | 11.2 |
| S03             | 0.237       | 0.245 | 0.089          | 0.107 | 13.9      | 14.8 |
| S04             | 0.216       | 0.196 | 0.073          | 0.055 | 16.0      | 18.1 |
| S05             | 0.436       | 0.396 | 0.078          | 0.082 | 14.1      | 18.0 |
| S06             | 0.405       | 0.402 | 0.065          | 0.066 | 15.4      | 14.5 |
| S07             | 0.228       | 0.223 | 0.077          | 0.076 | 24.6      | 20.3 |
| S08             | 0.372       | 0.377 | 0.115          | 0.105 | 18.0      | 10.3 |
| S09             | 0.129       | 0.125 | 0.063          | 0.068 | 9.1       | 12.1 |
| S10             | 0.316       | 0.306 | 0.081          | 0.075 | 7.4       | 12.4 |
| S11             | 0.372       | 0.360 | 0.114          | 0.125 | 20.1      | 17.7 |
| average error = |             |       |                |       | 14.4      | 14.9 |

Table 3: Log-normal fit: location and scale parameters, and fit error for  $I_1$ .

| Subject         | $\hat{\mu}$ |       | $\hat{\sigma}$ |       | Error [%] |      |
|-----------------|-------------|-------|----------------|-------|-----------|------|
|                 | LL          | RL    | LL             | RL    | LL        | RL   |
| S01             | 0.408       | 0.390 | 0.209          | 0.184 | 9.4       | 13.2 |
| S02             | 0.509       | 0.522 | 0.144          | 0.171 | 9.9       | 14.6 |
| S03             | 0.450       | 0.452 | 0.178          | 0.214 | 12.2      | 13.5 |
| S04             | 0.418       | 0.374 | 0.143          | 0.115 | 14.7      | 14.9 |
| S05             | 0.837       | 0.761 | 0.158          | 0.168 | 15.3      | 18.9 |
| S06             | 0.788       | 0.774 | 0.132          | 0.136 | 18.7      | 16.8 |
| S07             | 0.443       | 0.414 | 0.158          | 0.157 | 25.8      | 24.4 |
| S08             | 0.704       | 0.705 | 0.239          | 0.208 | 18.0      | 13.1 |
| S09             | 0.247       | 0.233 | 0.128          | 0.138 | 11.0      | 14.0 |
| S10             | 0.608       | 0.585 | 0.165          | 0.157 | 8.3       | 16.1 |
| S11             | 0.707       | 0.669 | 0.232          | 0.263 | 17.9      | 19.2 |
| average error = |             |       |                |       | 14.7      | 16.2 |

Table 4: Log-normal fit: location and scale parameters and fit error for  $I_2$ .
